# Supplementary material for: A Potential Biomarker of Dynamic Change in Peripheral CD45RA−CD27+CD127+ Central Memory T Cells for Anti-PD-1 Therapy in Patients with Esophageal Squamous Cell Carcinoma
Source: MDPI journal article supplement (doi:10.3390/cancers15143641), 2023-07-16

# Supplementary Figure S1

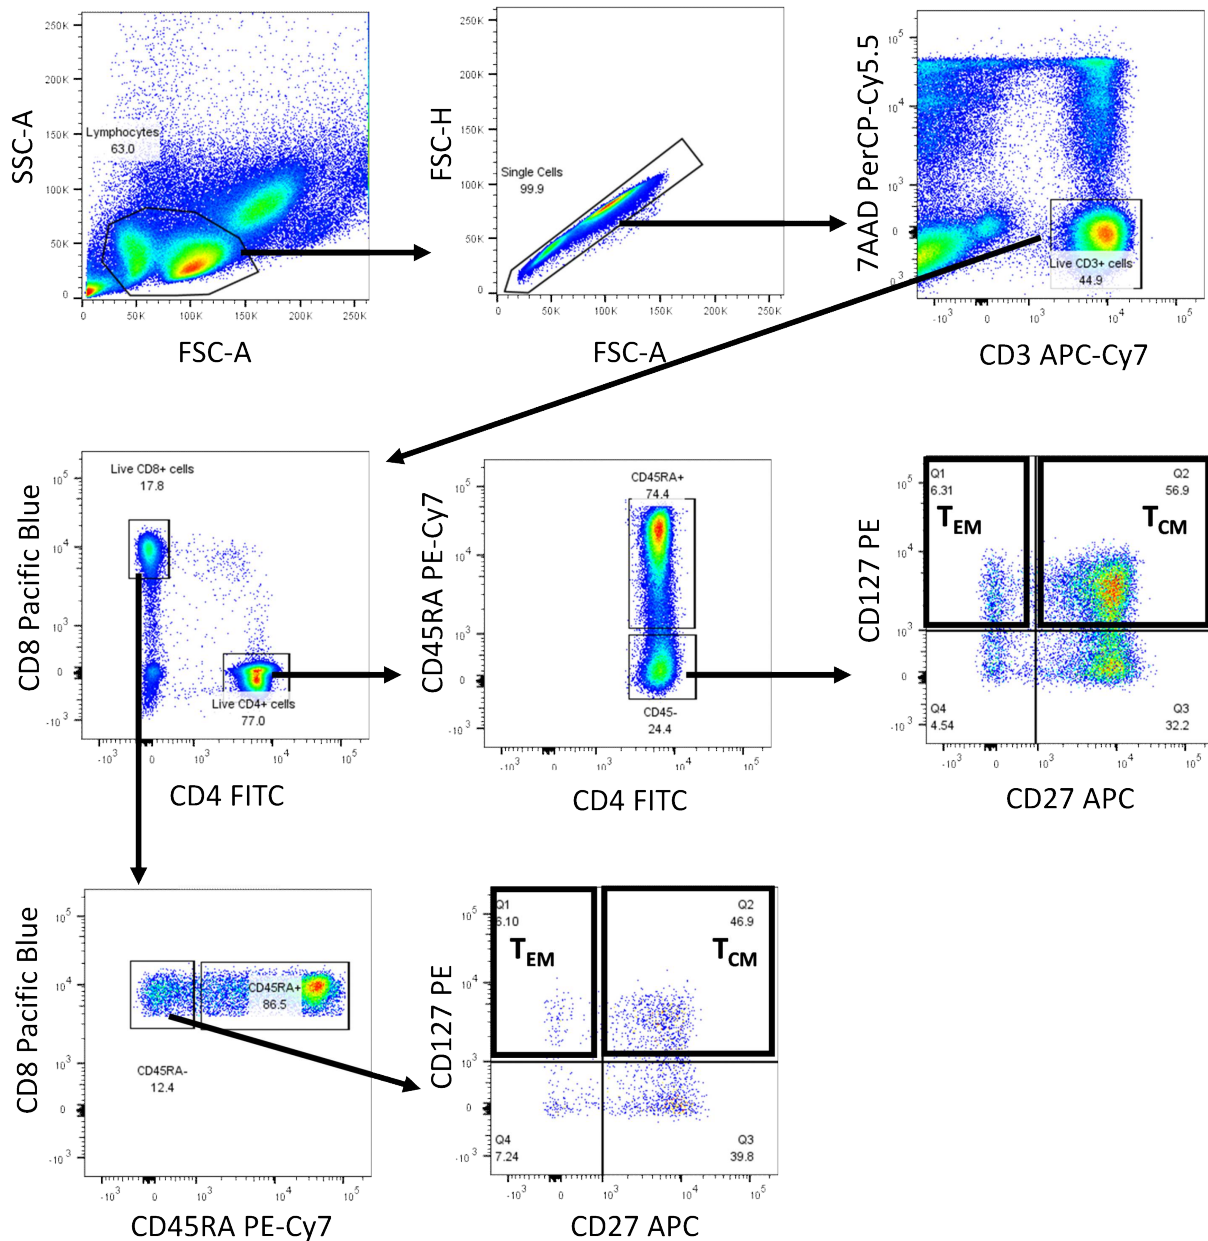

Supplementary Figure S2

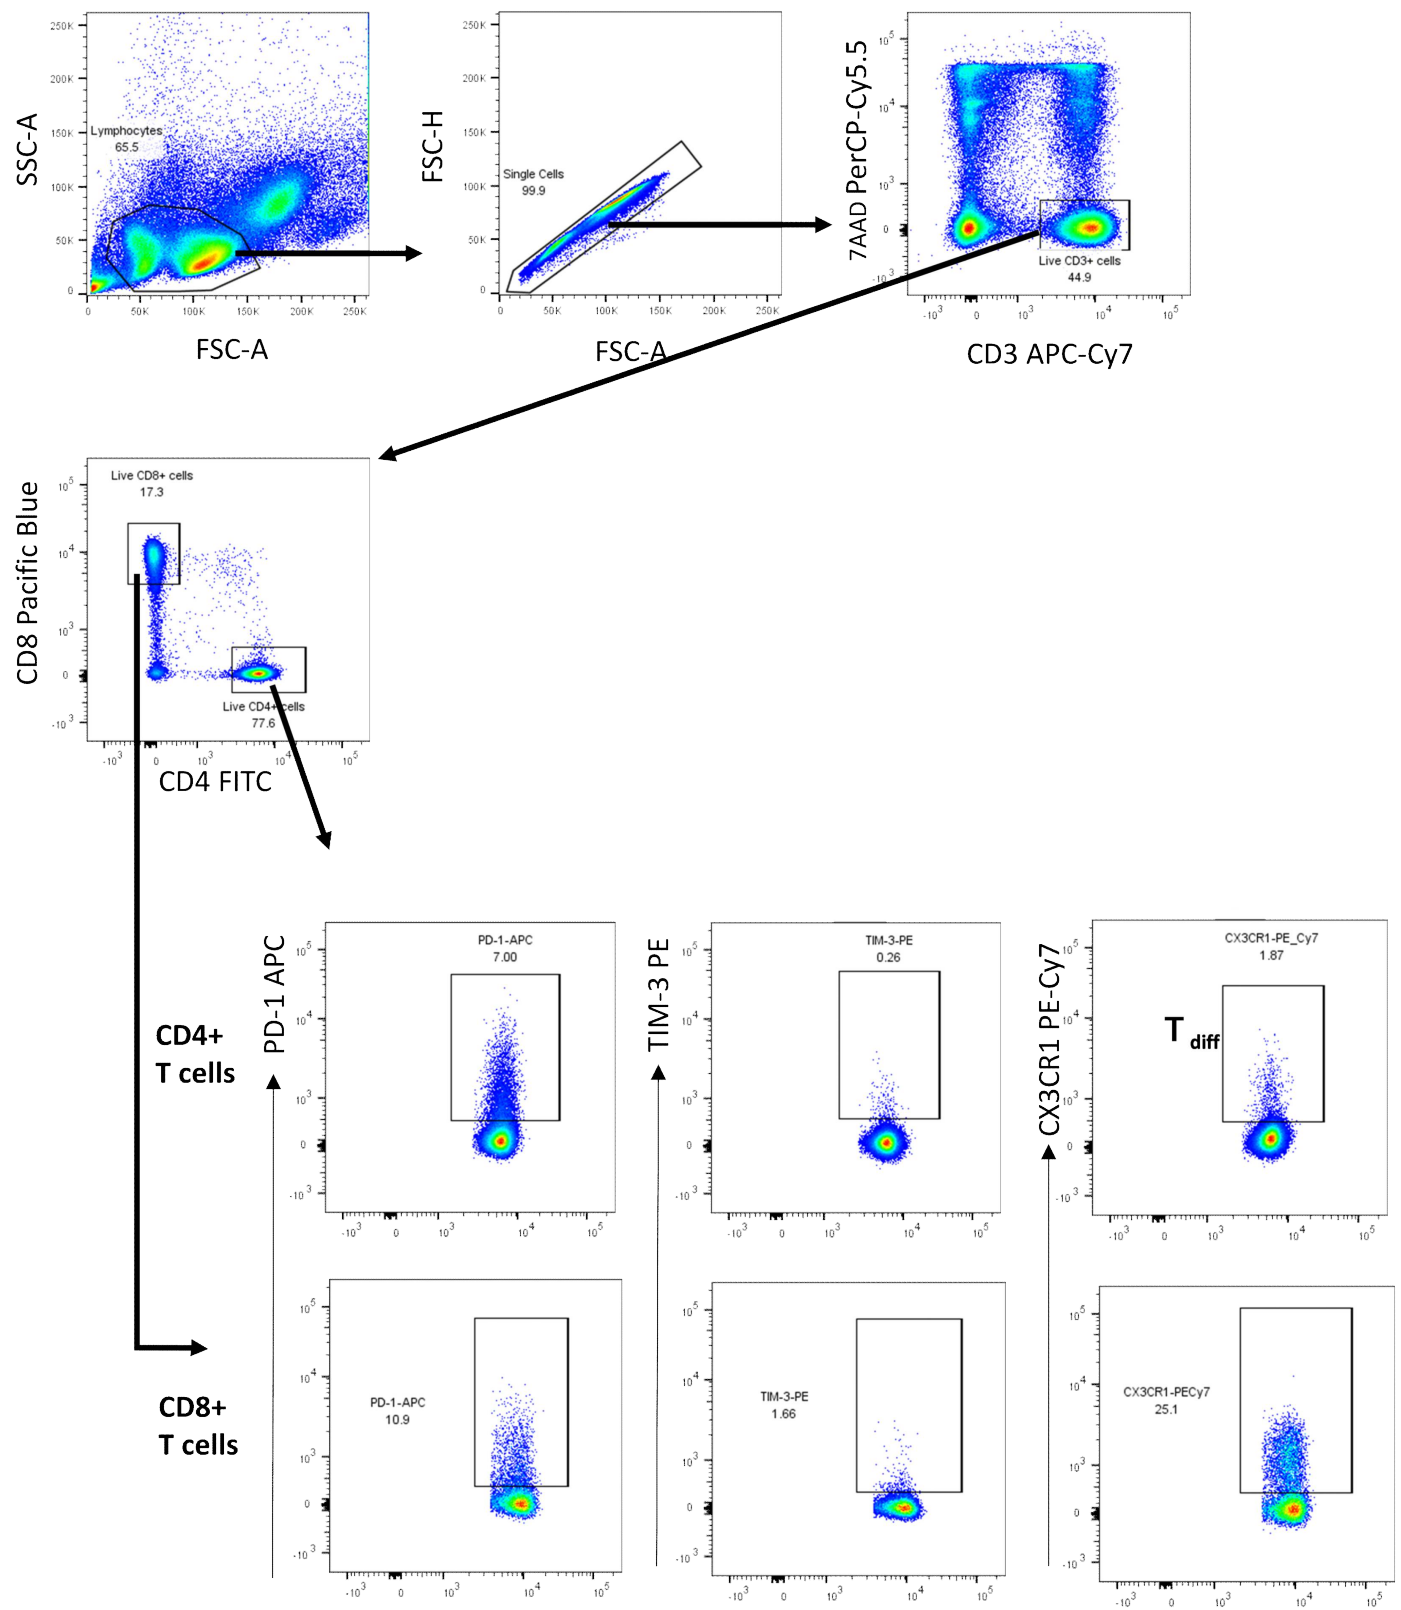

Supplementary Figure S3

a

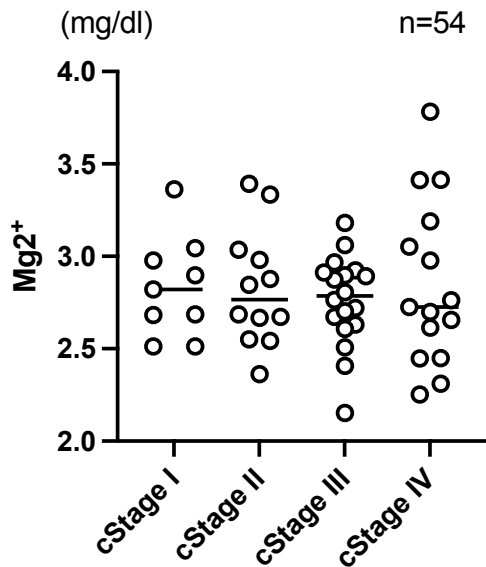

b

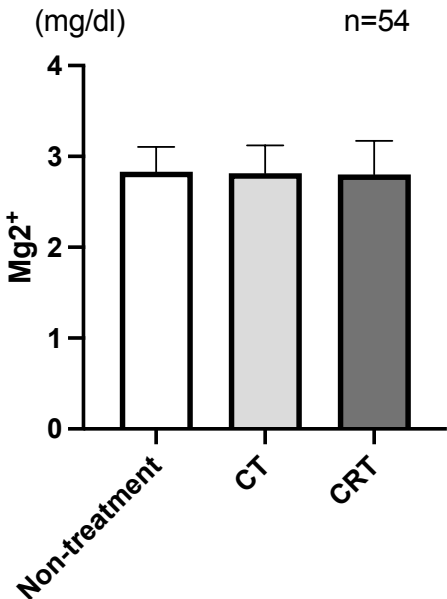

c

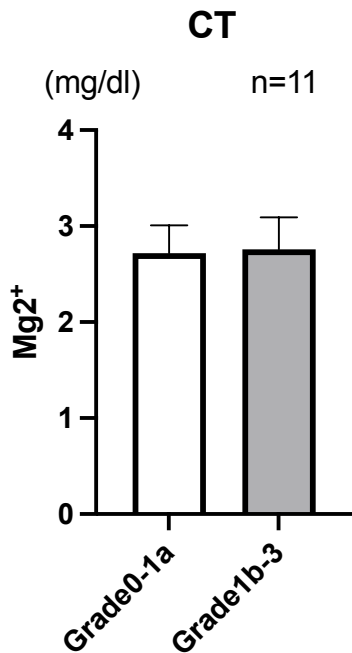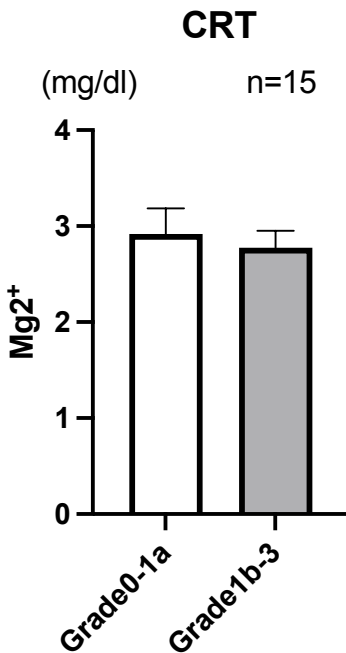

Supplementary Figure S4

a

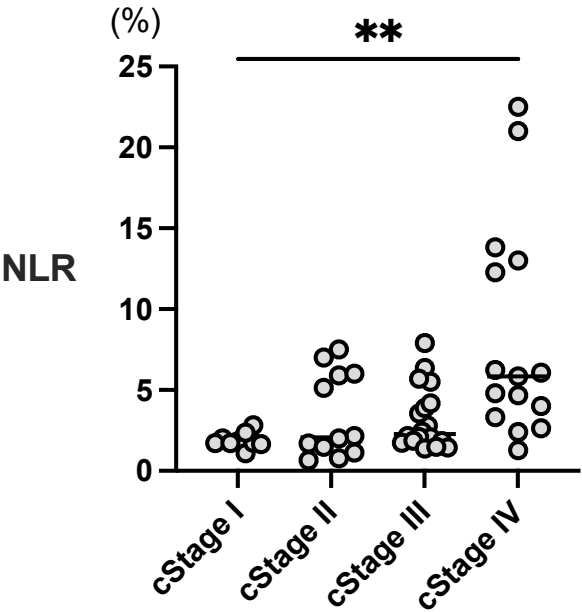

b

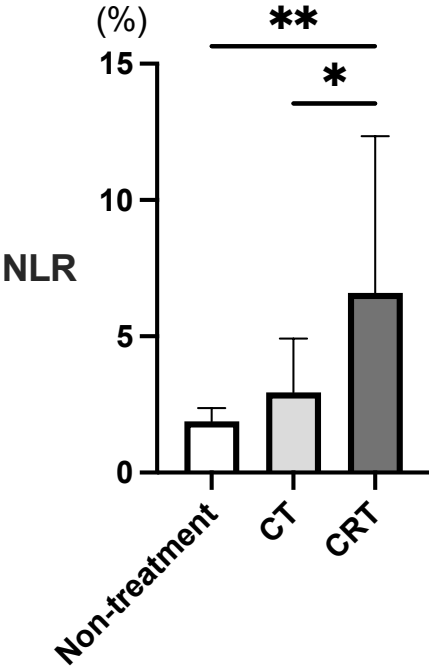

c

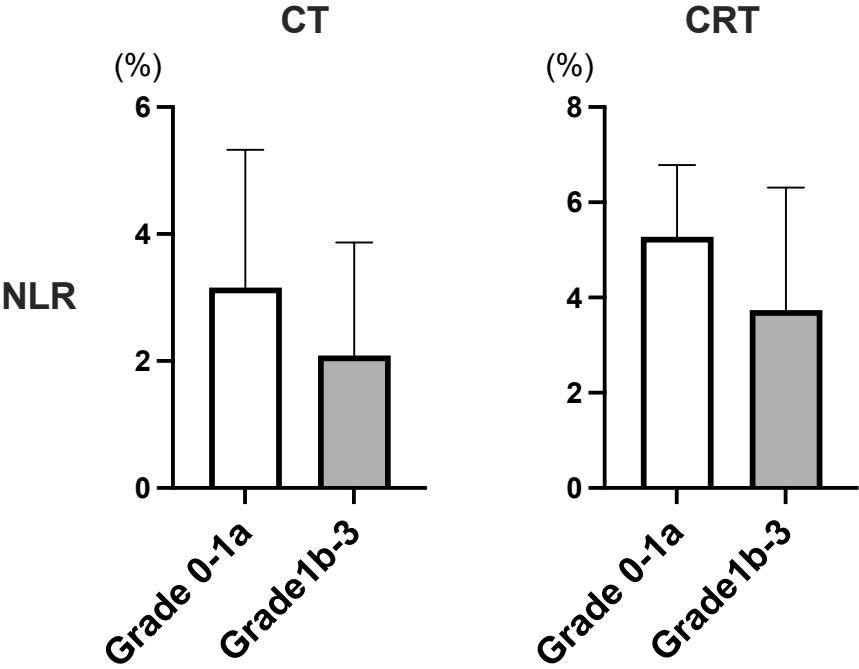

Supplement: s1 [file s1]
